# Supplementary material for: OsPHR2-mediated recruitment of Pseudomonadaceae enhances rice phosphorus uptake
Source: PubMed Central journal article supplement (PMC11369732; doi:10.1016/j.xplc.2024.100930), 2024-04-29
Supplement: mmc1.pdf [file mmc1.pdf]

**Plant Communications, Volume 5**

**Supplemental information**

**OsPHR2-mediated recruitment of Pseudomonadaceae enhances rice  
phosphorus uptake**

**Jianping Liu, Weifeng Xu, Qian Zhang, Wencheng Liao, Liang Li, Shu Chen, Jinyong  
Yang, Zhengrui Wang, and Feiyun Xu**

## 1. Supplementary Tables

**Table S1** Soil chemical factors.

| Soil component | Organic C<br>(g/kg) | Total N<br>(g/kg) | Total P<br>(g/kg) | Total K<br>(g/kg) | Olsen-P<br>(mg/kg) | Exchangeable<br>K (mg/kg) |
|----------------|---------------------|-------------------|-------------------|-------------------|--------------------|---------------------------|
|                | 35.6                | 1.02              | 0.537             | 36.3              | 49.5               | 92                        |

## 2. Supplementary Figures

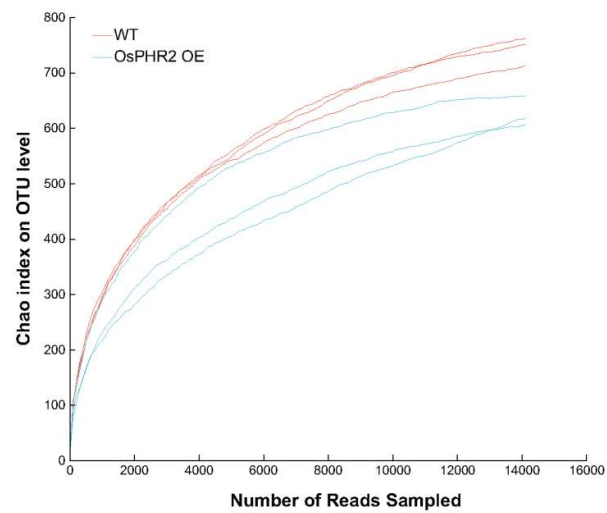

**Fig. S1** The gradually flattening rarefaction curves of root samples.

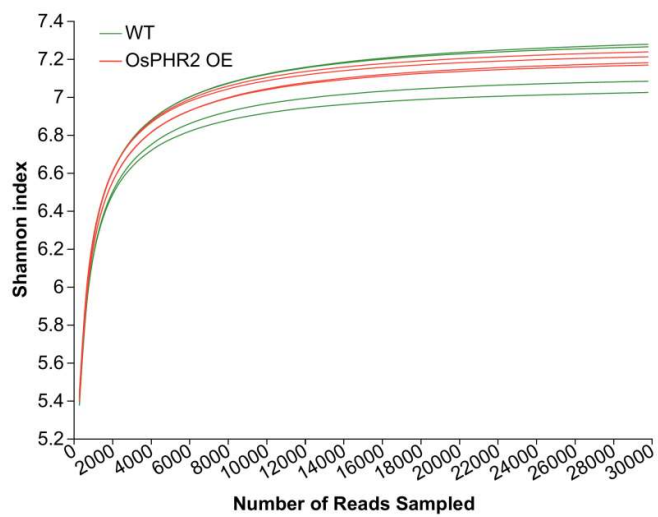

**Fig. S2** The gradually flattening rarefaction curves of rhizosphere soil samples.

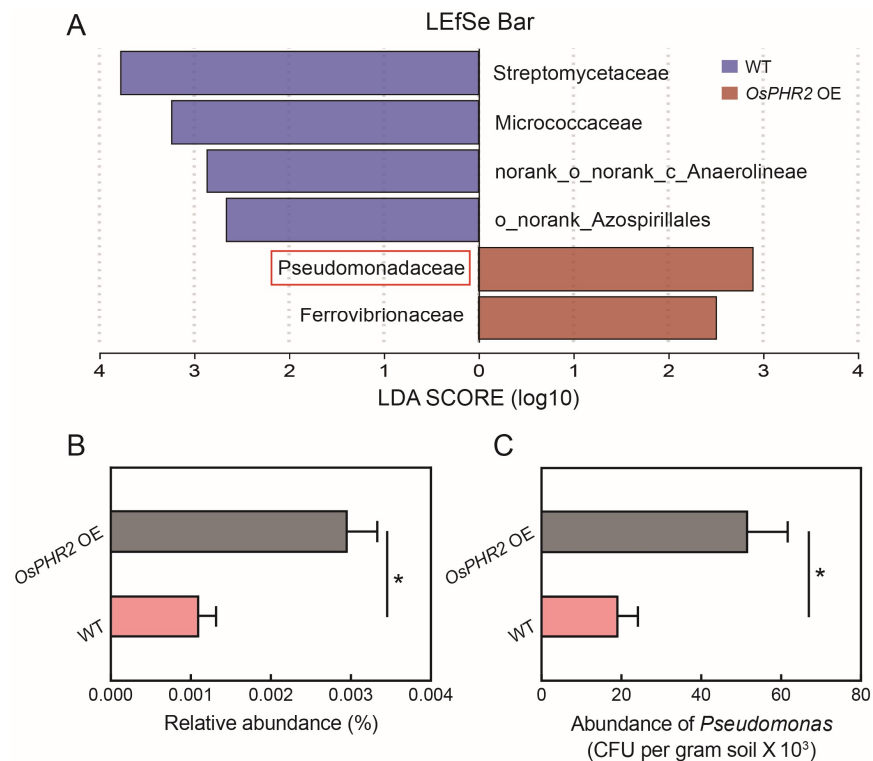

**Fig. S3 A**, Liner discriminant analysis effect size (LEfSe) analysis of bacterial taxon with significant difference in abundances in WT and *OsPHR2* OE rhizosphere soil. Linear discriminant analysis score  $\geq 2.5$ . **B**, Relative abundances of Pseudomonadaceae in WT and *OsPHR2* OE rhizosphere soil. Data are means  $\pm$  SD ( $n = 3$ ). **C**, Abundance of cultivable *Pseudomonas* in rhizosphere soil of WT and *OsPHR2* OE rice. Data are means  $\pm$  SD ( $n = 3$ ). Asterisks indicate significant difference between soil environments by two-sided Student's *t*-test ( $*p < 0.05$ ).

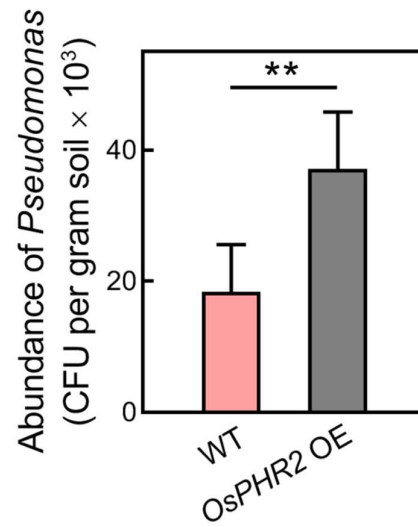

**Fig. S4** Abundance of cultivable *Pseudomonas* in root of WT and *OsPHR2* OE rice in low phosphorus soil. Data are means  $\pm$  SD ( $n = 6$ ). Asterisks indicate significant difference between soil environments by two-sided Student's *t*-test ( $*p < 0.01$ ).

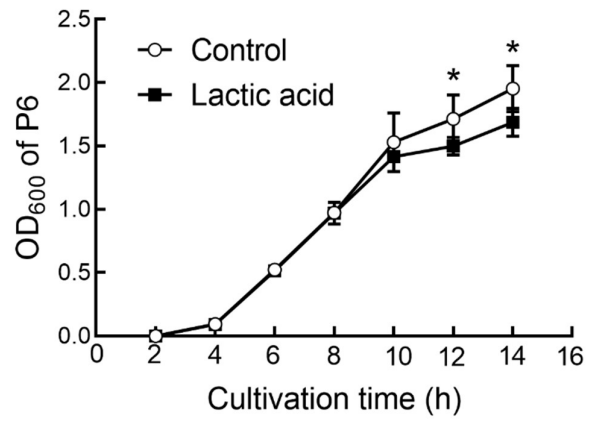

**Fig. S5** The growth of strain P6 with addition of lactic acid. Data are means  $\pm$  SD ( $n = 5$ ). Asterisks indicate significant difference by two-sided Student's  $t$ -test ( $*p < 0.05$ ).

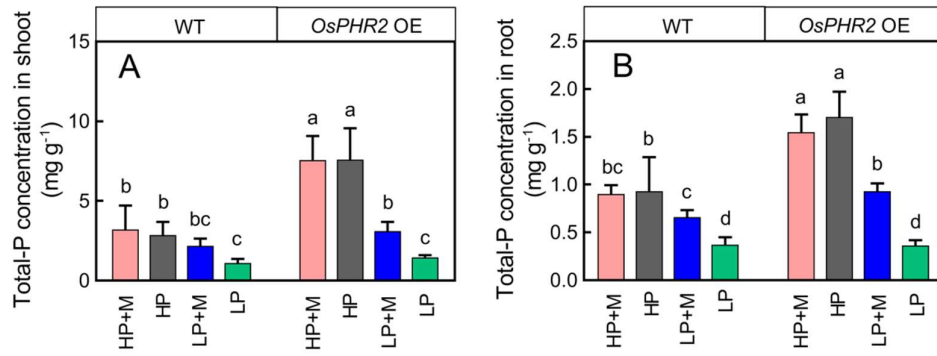

**Fig. S6** Shoot and root total P concentration of WT and *OsPHR2* OE rice inoculated with mixed strains under HP (HP+M), not inoculated under HP (HP), inoculated with mixed strains under LP (LP+M), not inoculated under LP (LP). Data are means  $\pm$  SD ( $n = 5$ ). Bars with different letters among different treatments indicate significantly different at  $p < 0.05$  (ANOVA, Duncan's multiple range test).



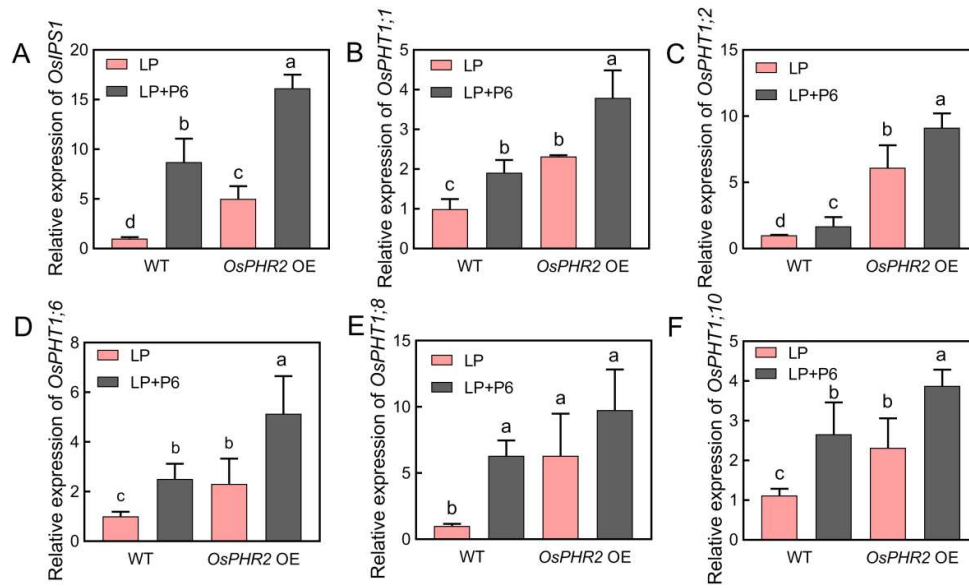

**Fig. S7** Relative expression of P transporter genes and P starvation-induced marker gene in WT and *OsPHR2* OE rice inoculated with P6 under LP (LP+P6), not inoculated under LP (LP). Data are means  $\pm$  SD ( $n = 3$ ). Bars with different letters among different treatments indicate significantly different at  $p < 0.05$  (ANOVA, Duncan's multiple range test).
